# Supplementary material for: A Novel ALDH2 Activator AD-9308 Improves Diastolic and Systolic Myocardial Functions in Streptozotocin-Induced Diabetic Mice
Source: MDPI journal article supplement (doi:10.3390/antiox10030450), 2021-03-13
Supplement: s1 [file s1]

# antioxidants-1113200-Supplementary

## 1. Materials and Methods

### Measurement of cardiomyocyte size

Cardiac tissue sections were subjected to hematoxylin and eosin (H&E) stain and were taken images using Olympus BX51 microscope. Two random fields from each of the one non-serial tissue sections per animal were analyzed. The quantification of myocyte diameter was determined using Image J software as described previously [1].

## 2. Figures

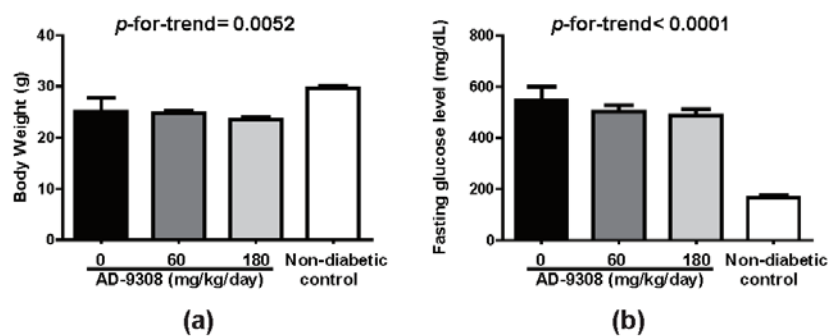

**Figure S1.** Characterization of the streptozotocin (STZ)-induced diabetic mice with AD-9308 treatment. The mean (a) body weight and (b) fasting blood glucose level were measured in STZ-induced diabetic mice treated with 0, 60, 180 mg/kg/day of AD-9308 by oral gavages and non-diabetic control mice at the age of 5 month. Data are presented as mean $\pm$  SEM (n= 14-16). *p*-for-trend was used to test linear trend.

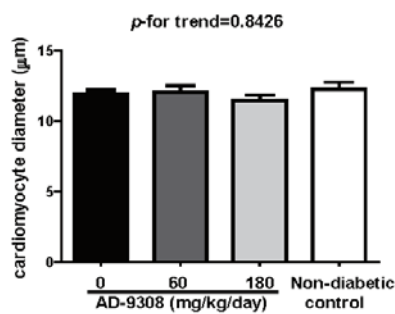

**Figure S2.** Cardiomyocyte size of the streptozotocin (STZ)-induced diabetic mice with AD-9308 treatment. The mean cardiomyocyte diameters were measured in cardiac tissue from STZ-induced diabetic mice treated with 0, 60, 180 mg/kg/day of AD-9308 by oral gavages and non-diabetic control mice. Data are presented as mean $\pm$  SEM (n= 14-16). *p*-for-trend was used to test linear trend.

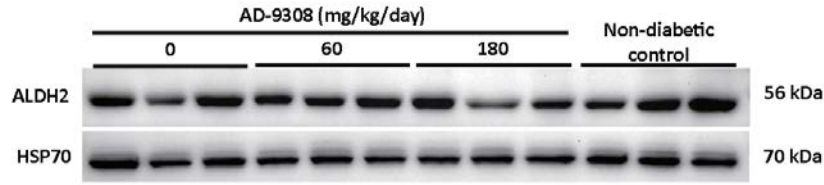

**Figure S3.** ALDH2 protein expression levels of the streptozotocin (STZ)-induced diabetic mice with AD-9308 treatment. Immunoblottings of ALDH2 were detected in cardiac tissue from STZ-induced diabetic mice treated with 0, 60, 180 mg/kg/day of AD-9308 by oral gavages and non-diabetic control mice.

### 3. Tables

**Table S1.** Primary antibodies used in this study.

| Antibody              | Concentration | Brand                            |
|-----------------------|---------------|----------------------------------|
| 4-HNE                 | 1:1000        | Sigma-Aldrich; 393207            |
| HSP70                 | 1:5000        | Abcam; ab45133                   |
| Ho-1                  | 1:2000        | GeneTex; GTX101147               |
| iNOS                  | 1:2000        | Cell Signaling Technology; 2982S |
| Bcl-2                 | 1:2000        | GeneTex; GTX100064               |
| Bax                   | 1:2000        | GeneTex; GTX109683               |
| Casp3                 | 1:2000        | GeneTex; GTX110543               |
| GAPDH                 | 1:5000        | GeneTex; GTX100118               |
| I $\kappa$ b $\alpha$ | 1:1000        | GeneTex; GTX110521               |
| p65                   | 1:5000        | Abcam; ab32536                   |
| $\alpha$ -tubulin     | 1:5000        | Proteintech; HRP-60031           |
| Histone H3            | 1:5000        | Abcam; ab1791                    |
| Opa1                  | 1:1000        | GeneTex; GTX129917               |
| Drp1                  | 1:2000        | Cell Signaling Technology; D6C7  |
| Beclin 1              | 1:2000        | GeneTex; GTX133555               |
| Lc3A                  | 1:2000        | GeneTex; GTX132889               |
| Lc3B                  | 1:2000        | GeneTex; GTX127375               |
| Serca2                | 1:2000        | ABclonal; A1097                  |
| Pln                   | 1:2000        | ABclonal; A17964                 |

**Table S2.** RT-qPCR primer sequences used in this study.

| primer         | Gene ID | Forward primer       | Reverse primer         |
|----------------|---------|----------------------|------------------------|
| 18S            | 19791   | ACGATGCCGACTGGCGATGC | TCCTGGTGGTGCCCTTCCGT   |
| Tgf- $\beta$ 1 | 21083   | CTCCCGTGGCTTCTAGTGC  | GCCTTAGTTTGGACAGGATCTG |
| Ctgf           | 14219   | AGAACTGTGTACGGAGCGTG | GTGCACCATCTTTGGCAGTG   |
| Fsp1           | 20198   | TGTAATTGTGTCCACCTTCC | GCTCATCACCTTCTGGAATG   |
| Postn          | 50706   | AAGTTGGCCTTAGCGACCTC | GCAGGGATTCTCTGCTGGT    |
| Fn-1           | 14268   | TGGTGGCCACTAAATACGAA | GGAGGGCTAACATTCTCCAG   |
| Tgf- $\beta$ 2 | 21808   | CAGTGGGAAGACCCACATC  | TGTAAAGAGGGCGAAGGCAG   |
| $\alpha$ -Sma  | 11475   | GTACCCAGGCATTGCTGACA | GAGGCGCTGATCCACAAAAC   |
| CollIV         | 12826   | GGCAGACTCGGACCACTATG | TGGTACGTGTGGTAACTTCTCT |

|                                |       |                           |                          |
|--------------------------------|-------|---------------------------|--------------------------|
| <i>Il-1<math>\beta</math></i>  | 16176 | CACAGCAGCACATCAACAAG      | GTGCTCATGTCCTCATCCTG     |
| <i>Il-6</i>                    | 16193 | TAGTCCTTCCTACCCCAATTCC    | TTGGTCCTTAGCCACTCCTTC    |
| <i>Inf<math>\gamma</math></i>  | 15978 | CGGCACAGTCATTGAAAGCCTA    | GTTGCTGATGGCCTGATTGTC    |
| <i>Mcp-1</i>                   | 20296 | GCTACAAGAGGATCACCAGCAG    | GTCTGGACCCATTCTTCTTGG    |
| <i>Sap</i>                     | 20219 | TTTGGGTCAATGGAAAGCCTTGGG  | TGACCTTTGAAACCCTCCTCCGTA |
| <i>Tnf-<math>\alpha</math></i> | 21926 | TACTGAACTTCGGGGTGATTGGTCC | CAGCCTTGTCCTTGAAGAGAACC  |

**Reference:**

1. Kawai, K., Qin, F., Shite, J., Mao, W., Fukuoka, S., Liang, C.S. Importance of antioxidant and antiapoptotic effects of beta-receptor blockers in heart failure therapy. Am. J. Physiol. Heart Circ. Physiol. 2004, 287 (3): pp. H1003-H1012. [doi: 10.1152/ajpheart.00797.2003]
